# Supplementary material
Source: publisher site journal article supplement (https://www.dovepress.com/article/370304)
Supplement: Supplementary file 1 [file get_supplementary_file.php]

Appendix 1

**Interview Guide**

‘Medical education across the generation gap. What can we learn from the experience of current stakeholders: A Qualitative Study’

# Introduction:

Thank you for being a part of this research and taking your time for this interview session. You will remain anonymous and there will be no records of this interview with your name on it. I am interested to hear about your opinion, perspective and personal experience and so there are no right or wrong answer. Please feel free to interrupt, ask for clarification or refuse to answer any question that you feel uncomfortable with. Do I have your permission to record this interview?

# Topic 1 (Role in the university):

To start off, I am going to ask you a little about yourself and describe your role in the university and because the topic is about generation gap, it is important that I am able to identify your generation, would you mind telling me your year of birth?

- Can you tell me your role in the medical school?
- If teacher:
  - How long have you been teaching and what are the teaching and learning activities are you involved in/ responsible for?
  - Can you tell me about your role in faculty development?
  - Can you tell me why you’re interested in faculty development?
- If student:
  - How long have you been a medical student?
  - What are the teaching and learning activities have you experienced so far?

# Topic 2 (Exploring participants’ experience):

Moving on to the next topic, I want to explore your experience of the undergraduate medical education interacting with teachers/students from a different generation group.

- Pleasant experience, what makes you think it supported your teaching/learning and why?
- Least pleasant experience, what makes you think it obstructed your teaching/learning and why?
- How do you find intergenerational learning (notice / unnoticeable) and does it affect your teaching /learning in any way? If so, how? If not, how?
- What are some differences /similarities in values, behaviour that you experience when interacting with students/teachers from different generation group?
  - Can you tell me more about what happened and your response towards the experience?
  - Why do you think you responded the way you did?
- What do you think of the collaboration/relationship between teacher and student in the learning and teaching process / educational environment / curriculum delivery?

# Topic 3 (Faculty development):

- Explore participant’s hopes and ideas on interaction
- Hopes and ideas on faculty development

# Closure:

Thank you for your time and willingness to participate and take part in this interview session. Before we close, do you have anything you want to clarify or add about the topic we discussed? There may be a possibility of a follow-up interview if needed in which I will contact you to arrange another interview. Thank you!
